# Supplementary material for: A novel oral micellar fenretinide formulation with enhanced bioavailability and antitumour activity against multiple tumours from cancer stem cells
Source: PubMed Central journal article supplement (PMC6706930; doi:10.1186/s13046-019-1383-9), 2019-08-22
Supplement: 13046_2019_1383_MOESM1_ESM.pdf [file 13046_2019_1383_MOESM1_ESM.pdf]

## **SUPPLEMENTARY FIGURE LEGENDS:**

**Supplementary Figure 1:** Metabolites plasma concentrations (MPR and oxo-4-HPR) determined in mice after single oral treatment of 4 doses of Bio-nFeR: 10, 50, 100 and 200 mg/Kg. The analysis was performed after 0, 24, 48 h.

**Supplementary Figure 2:** Evaluation of the 50% inhibitory concentration (IC<sub>50</sub>) of Bio-nFeR and NCI-FeR formulation was done on a representative lung cancer stem cell line (LCSC). The cells were exposed to the indicated drug doses (0-30  $\mu$ M) and cell viability was evaluated by CellTiter-Glo after 72 hours.

**Supplementary Figure 3:** A) Sphingomyelin-Ceramide (SM-CER) and Sphingomyelin-Dihydro-Ceramide (SM-DH-CER) content in lung (LC), melanoma (MEL) and colon (CRC) tumors treated with Bio-nFeR at single 100-150 mg/Kg administration were quantified through Ultra High Performance Liquid Chromatography (UHPLC), normalized to control and plotted as fold change. B) Quantification of Glucosyl-Ceramide (GLC-CER) and Glucosyl-Dihydro-Ceramide (GLC-DH-CER) in the same samples as in A, normalized to control and plotted as fold change.

**Supplementary Figure 4:** Cancer stem cell marker expression in CSC-culture conditions and in CSC-derived xenografts. A) Flow cytometry analysis of Aldefluor (left panels) and CD44v6 (middle and right panels) in the indicated CSC and xenograft samples. B) Immunoblot analysis of CSC antigens c-Kit and SOX-2 in the indicated control (-) or Bio-nFeR treated (+) melanoma xenografts.  $\beta$ -actin blot was used for equal loading control.

**Supplementary Figure 5:** Growth curves of lung CSC-derived xenografts in control mice or mice treated with Bio-nFeR or NCI-FeR at 100 mg/kg dose for the indicated times. Mean  $\pm$  standard error is shown. \*P<0.05

## **SUPPLEMENTARY TABLE LEGENDS:**

**Supplementary Table 1:** Hepatic enzyme determination in mice after single administration or two weeks oral daily treatment at dose of 150 mg/kg of Bio-nFeR or NCI-FeR formulation. AST: Aspartate transaminase; ALT: Alanine transaminase; Bil tot: Bilirubin total; Vehicle after 24h.

**Supplementary Table 2:** Quantification of 4-HPR and metabolites (oxo-4-HPR e MPR) determined in mice after oral Bio-nFeR single treatment of BNF: 10, 50, 100 and 200 mg/Kg (A) or Bio-nFeR at dose of 200mg/kg in comparison to the NCI-FeR formulation (B). C<sub>max</sub>: maximum plasma concentration achieved after drug administration; T<sub>max</sub>: time until C<sub>max</sub> is reached; AUC last: experimental area under the concentration-time curve from time 0 to the last experimental point measured (C<sub>last</sub>); HL: plasma half-life of the terminal phase calculated by:  $HL = 0.693/ke$ ,

**Supplementary Table 3:** 4-HPR and metabolites (oxo-4-HPR, MPR and DH-4-HPR) evaluated after oral Bio-nFeR single (day 1) or repeated daily treatment at dose of 150 mg/kg. C<sub>max</sub>: maximum plasma concentration achieved after drug administration; T<sub>max</sub>: time until C<sub>max</sub> is reached; AUC last: experimental area under the concentration-time

curve from time 0 to the last experimental point measured (Cl<sub>ast</sub>); HL: plasma half-life of the terminal phase calculated by:  $HL = 0.693/k_e$ ,

**Supplementary Table 4:** 4-HPR and metabolites concentrations measured after 24 hours in feces of mice after acute treatment at different doses of Bio-nFeR (10, 50, 100 and 200 mg/Kg) (A) and after chronic treatment at dose of 150mg/kg (B), in comparison with the NCI-FeR formulation.

**Supplementary Table 5:** 4-HPR and metabolites (MPR, oxo-4-HPR and DH-4-HPR) concentrations in plasma and tumors (lung cancer, melanoma and colon cancer) as in Figure 4BC.

A

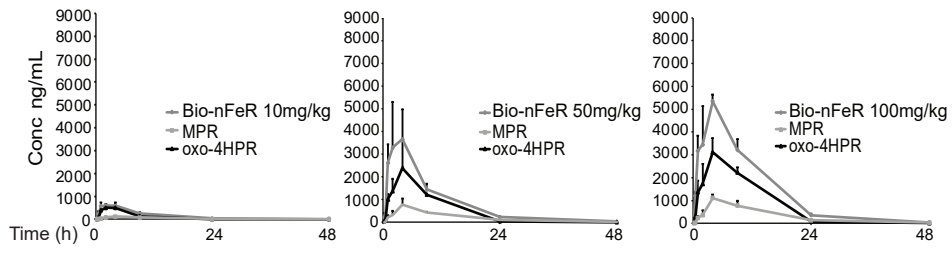

B

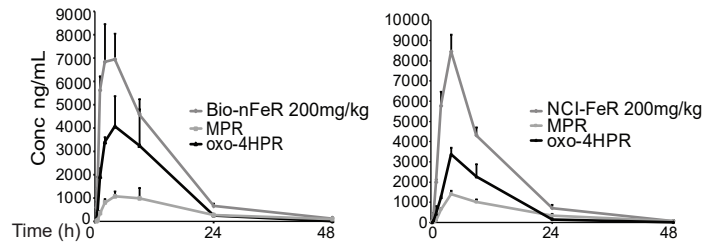

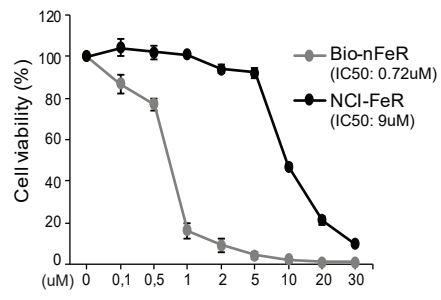

Supplementary Figure 2

A

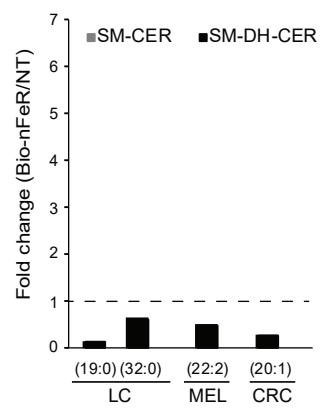

B

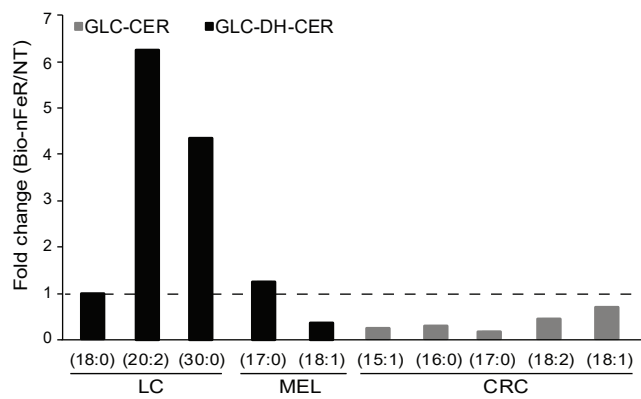

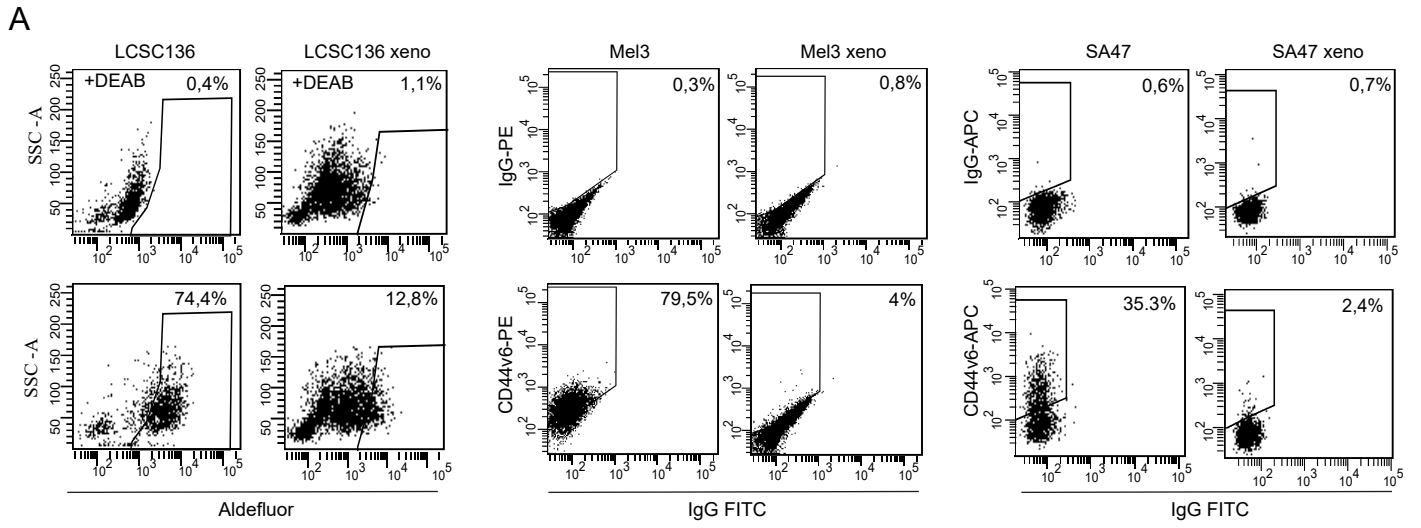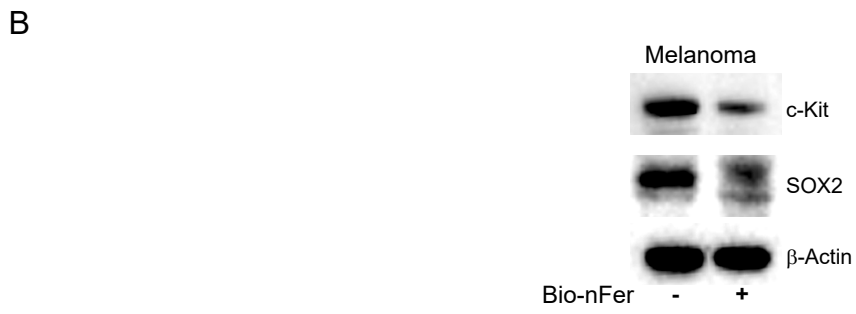

Supplementary Figure 4

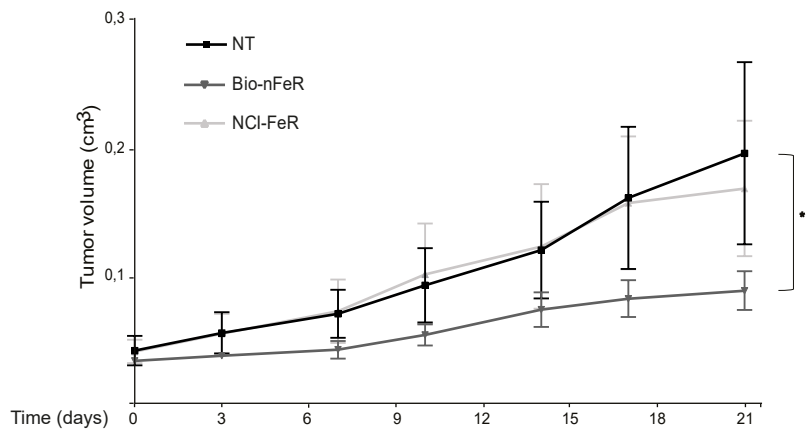

Supplementary Figure 5

Supplementary Table 1

| Administration Schedule | Dose (mg/kg) | Formulation | AST       |              | ALT       |           | BIL <sub>tot</sub> |           |
|-------------------------|--------------|-------------|-----------|--------------|-----------|-----------|--------------------|-----------|
|                         |              |             | 24h       | 48h          | 24h       | 48h       | 24h                | 48h       |
| Single admin.           | 150          | NCI-FeR     | 123±35,64 | -            | 38±1,73   | -         | 0,39±0,11          | -         |
|                         |              | Bio-nFeR    | 120±39,34 | -            | 34±4,58   | -         | 0,49±0,01          | -         |
| 2 wks<br>1 daily dose   | 150          | NCI-FeR     | 85,6±8,2  | 137,66±32,25 | 28,3±3,05 | 32,66±5,5 | 0,4±0,07           | 0,65±0,36 |
|                         |              | Bio-nFeR    | 96,3±2,51 | 108±28,58    | 30,3±3,78 | 30±6,24   | 0,31±0,12          | 0,82±0,27 |
| Vehicle                 |              |             | 89,3±8,14 |              | 26,7±4,93 |           | 0,4±0,05           |           |



Supplementary Table 2 A

| Bio-nFeR (mg/kg) | 10                    | 50                     | 100                   | 200                    | 10        | 50 | 100 | 200 | 10                    | 50      | 100     | 200      | 10      | 50   | 100 | 200  |
|------------------|-----------------------|------------------------|-----------------------|------------------------|-----------|----|-----|-----|-----------------------|---------|---------|----------|---------|------|-----|------|
| Parameters       | Cmax $\pm$ SD (ng/ml) |                        |                       |                        | Tmax (hr) |    |     |     | AUC 0-last (hr*ng/ml) |         |         |          | HL (hr) |      |     |      |
| 4-HPR            | 600.9<br>$\pm$ 68.1   | 3654.7<br>$\pm$ 1312.9 | 5340.9<br>$\pm$ 294.4 | 6837.8<br>$\pm$ 1613.8 | 2         | 4  | 4   | 2   | 6745.4                | 39156.9 | 66323.6 | 112957.1 | 7.5     | 7.3  | 6.5 | 7.2  |
| oxo-4-HPR        | 505.1<br>$\pm$ 82.9   | 2389.1<br>$\pm$ 1275.4 | 3109.1<br>$\pm$ 618.1 | 4071.2<br>$\pm$ 1295.5 | 2         | 4  | 4   | 4   | 4145.3                | 24372.6 | 38500.3 | 58677.2  | 5.2     | 5.4  | 4.8 | 5.3  |
| MPR              | 120.6<br>$\pm$ 23.8   | 778.9<br>$\pm$ 273.2   | 1112.6<br>$\pm$ 145.7 | 1070.5<br>$\pm$ 216.7  | 4         | 4  | 4   | 4   | 1750.7                | 9931.5  | 15439.7 | 21449.6  | 9.4     | 10.3 | 8.6 | 11.6 |

Supplementary Table 2 B

| Parameters | 4-HPR dose 200mg/Kg   |                        |           |          |                       |          |          |          |
|------------|-----------------------|------------------------|-----------|----------|-----------------------|----------|----------|----------|
|            | NCI-nFeR              | Bio-nFeR               | NCI-nFeR  | Bio-nFeR | NCI-nFeR              | Bio-nFeR | NCI-nFeR | Bio-nFeR |
|            | Cmax $\pm$ SD (ng/ml) |                        | Tmax (hr) |          | AUC 0-last (hr*ng/ml) |          | HL (hr)  |          |
| 4-HPR      | 8463.7<br>$\pm$ 826.0 | 6837.8<br>$\pm$ 1613.8 | 4         | 2        | 97906.1               | 112957.1 | 6.7      | 7.2      |
| oxo-4-HPR  | 3372.3<br>$\pm$ 327.9 | 4071.2<br>$\pm$ 1295.5 | 4         | 4        | 39875.4               | 58677.2  | 5.4      | 5.3      |
| MPR        | 1407.0<br>$\pm$ 162.6 | 1070.5<br>$\pm$ 216.7  | 4         | 4        | 23406.1               | 21449.6  | 9.9      | 11.6     |

Supplementary Table 3

| Parameters | Cmax $\pm$ SD (ng/ml)  |                        | Tmax (hr)    |                     | AUC 0-last (hr*ng/ml) |                     | HL (hr)      |                     |
|------------|------------------------|------------------------|--------------|---------------------|-----------------------|---------------------|--------------|---------------------|
|            | Day 1<br>150           | 2 week<br>150 daily    | Day 1<br>150 | 2 week<br>150 daily | Day 1<br>150          | 2 week<br>150 daily | Day 1<br>150 | 2 week<br>150 daily |
| 4-HPR      | 6350.0<br>$\pm$ 4153.9 | 6813.3<br>$\pm$ 1200.9 | 20           | 4                   | 56880.7               | 85097.1             | 5.3          | 5.7                 |
| oxo-4-HPR  | 2979.4<br>$\pm$ 2637.9 | 4282.6<br>$\pm$ 914.3  | 2.           | 4                   | 33726.1               | 54434.2             | 3.9          | 4.7                 |
| MPR        | 798.0<br>$\pm$ 127.4   | 1147.9<br>165.7        | 4            | 4                   | 10435.4               | 22086.1             | 8.6          | 11.2                |
| DH-4-HPR   | 308.5<br>$\pm$ 245.7   | 483.8<br>$\pm$ 97.1    | 2            | 4                   | 3106.4                | 5964.8              | 3.9          | 5                   |

### Supplementary Table 4A

Fecal excretion of acute treatment at multiple doses

| Dose (mg/kg) | 4-HPR       |             | MPR        |               | oxo-4HPR    |               | DH-4HPR  |              |
|--------------|-------------|-------------|------------|---------------|-------------|---------------|----------|--------------|
|              | NCI-FeR     | Bio-nFeR    | NCI-FeR    | Bio-nFeR      | NCI-FeR     | Bio-nFeR      | NCI-FeR  | Bio-nFeR     |
| 10           | x           | 4.7 (3.2%)  | x          | 0.03 (0.02 %) | x           | 47 (32.6 %)   | x        | 18.3 (12.3%) |
| 50           | x           | 38.2 (4.0%) | x          | 0.5 (0.05 %)  | x           | 253.8 (26.5%) | x        | 77.1 (8.2%)  |
| 100          | x           | 33.6 (1.9%) | x          | 0.7 (0.04 %)  | x           | 85.5 (4.9%)   | x        | 24.7 (1.4%)  |
| 200          | 153.4(5.5%) | 77.4(2.5%)  | 0.4(0.02%) | 1.2 (0.05 %)  | 115.6(3.9%) | 129.8(4.3%)   | 30(1.1%) | 37.4(1.2%)   |

### Supplementary Table 4B

Fecal excretion of chronic treatment

| Administration Schedule | Dose (mg/kg) | Formulation | 4-HPR        | MPR         | oxo-4HPR     | DH-4HPR      |
|-------------------------|--------------|-------------|--------------|-------------|--------------|--------------|
| Single admin.           | 150          | NCI-FeR     | 247.1 (9.2%) | 0.4 (0.02%) | 103.7 (4.2%) | 37.6 (1.41%) |
|                         |              | Bio-nFeR    | 129.5 (6.1%) | 1.6 (0.1%)  | 108.4 (5.0%) | 30.3 (1.4%)  |
| 2 wks<br>1 daily dose   | 150          | NCI-FeR     | 270 (7.6%)   | 0.8 (0.0%)  | 201.1 (6.6%) | 62.8 (2.1%)  |
|                         |              | Bio-nFeR    | 97.4 (4.2%)  | 0.9 (0.0%)  | 97.5 (4.2%)  | 30.8 (1.3%)  |

Supplementary Table 5

| Tumor types  | Mean concentration ng/ml ( $\pm$ sd) |            |           |            |             |            |           |          |
|--------------|--------------------------------------|------------|-----------|------------|-------------|------------|-----------|----------|
|              | 4-HPR                                |            | MPR       |            | oxo-4HPR    |            | DH-4HPR   |          |
|              | Plasma                               | Tumor      | Plasma    | Tumor      | Plasma      | Tumor      | Plasma    | Tumor    |
| Lung cancer  | 3446 (66)                            | 2228 (352) | 394 (68)  | 2282 (598) | 2142 (374)  | 2028 (150) | 355 (86)  | 580 (11) |
| Melanoma     | 1712 (456)                           | 2126 (684) | 190 (32)  | 707 (476)  | 1226 (220)  | 2323(134)  | 227 (50)  | 284 (13) |
| Colon cancer | 4987 (2725)                          | 1881 (493) | 790 (261) | 1090 (503) | 3519 (1319) | 2514 (189) | 478 (257) | 329 (45) |
